# Supplementary material for: The Impact of Extended E-Learning on Emotional Well-Being of Students during the COVID-19 Pandemic in Saudi Arabia
Source: MDPI journal article supplement (doi:10.3390/children9010013), 2021-12-27
Supplement: s1 [file s1]

## Supplementary Table

**Table S1.** Crosstab analysis between demographic variables and negative impact of the COVID-19 pandemic on daily life (N = 434).

| Negative impact of the COVID-19 pandemic on daily life |                                      | Not at All<br>n (%) | A Little<br>n (%) | Somewh<br>at<br>n (%) | A lot<br>n (%) | A great<br>deal<br>n (%) | Chi-square value<br>and significance |
|--------------------------------------------------------|--------------------------------------|---------------------|-------------------|-----------------------|----------------|--------------------------|--------------------------------------|
| Age Categories                                         | <20 years                            | 3 (3.2%)            | 33 (35%)          | 21 (22%)              | 27 (29%)       | 9 (10%)                  | $\chi^2(2)=29.6^{***}$               |
|                                                        | 21-23 years                          | 51(16%)             | 88 (28%)          | 75 (24%)              | 86 (27%)       | 13 (4%)                  |                                      |
|                                                        | 24-26 years                          | 3 (11%)             | 6 (21%)           | 12 (43%)              | 2 (7%)         | 5 (18%)                  |                                      |
| Field of Study                                         | Health Sciences                      | 25(10%)             | 62 (25%)          | 74 (30%)              | 62 (25%)       | 20 (8%)                  | $\chi^2(3)=40.7^{***}$               |
|                                                        | IT & Engineering                     | 3 (4%)              | 27 (40%)          | 7 (10%)               | 26 (38%)       | 4 (6%)                   |                                      |
|                                                        | Business &<br>Management<br>Sciences | 18(26%)             | 22 (32%)          | 13 (19%)              | 13 (19%)       | 3 (4%)                   |                                      |
|                                                        | Arts & Humanities                    | 11(20%)             | 16 (30%)          | 14 (25%)              | 14 (25%)       | 0 (0%)                   |                                      |
| Academic<br>performance                                | Low Academic<br>Performance          | 17(21%)             | 23 (29%)          | 17 (21%)              | 18 (23%)       | 5 (6%)                   | $\chi^2(2)=10.2$ (ns)                |
|                                                        | Average Academic<br>Performance      | 14(12%)             | 43 (36%)          | 27 (23%)              | 30 (25%)       | 6 (5%)                   |                                      |
|                                                        | High Academic<br>Performance         | 26(11%)             | 61 (26%)          | 64 (27%)              | 67 (29%)       | 16 (7%)                  |                                      |
| Employment                                             | Yes                                  | 31(14%)             | 71 (33%)          | 40 (19%)              | 49 (23%)       | 22 (10%)                 | $\chi^2(1)=22.5^{***}$               |
|                                                        | No                                   | 26(12%)             | 56 (25%)          | 68 (31%)              | 66 (30%)       | 5 (2%)                   |                                      |
| Married                                                | Yes                                  | 31(30%)             | 21 (21%)          | 26 (25%)              | 11 (11%)       | 13 (13%)                 | $\chi^2(1)=55.2^{***}$               |
|                                                        | No                                   | 26 (8%)             | 106(31%)          | 82 (25%)              | 104(31%)       | 14 (4%)                  |                                      |
| Parent of a child                                      | Yes                                  | 24(26%)             | 17 (19%)          | 26 (29%)              | 10 (11%)       | 13 (14%)                 | $\chi^2(1)=43.2^{***}$               |
|                                                        | No                                   | 33(10%)             | 110(32%)          | 82 (23%)              | 105(31%)       | 14 (4%)                  |                                      |

Levels of significance=\*\*\* $p<0.001$ ; \*\* $p<0.01$ , \* $p<0.05$ ; ns=non-significant
